# Supplementary material for: Editing of the TRIM5 Gene Decreases the Permissiveness of Human T Lymphocytic Cells to HIV-1
Source: PubMed Central journal article supplement (PMC7824555; doi:10.3390/v13010024), 2020-12-25
Supplement: viruses-13-00024-s001.pdf [file viruses-13-00024-s001.pdf]

Désaulniers et al.

Editing of the TRIM5 gene decreases the permissiveness of human T lymphocytic cells to HIV-1

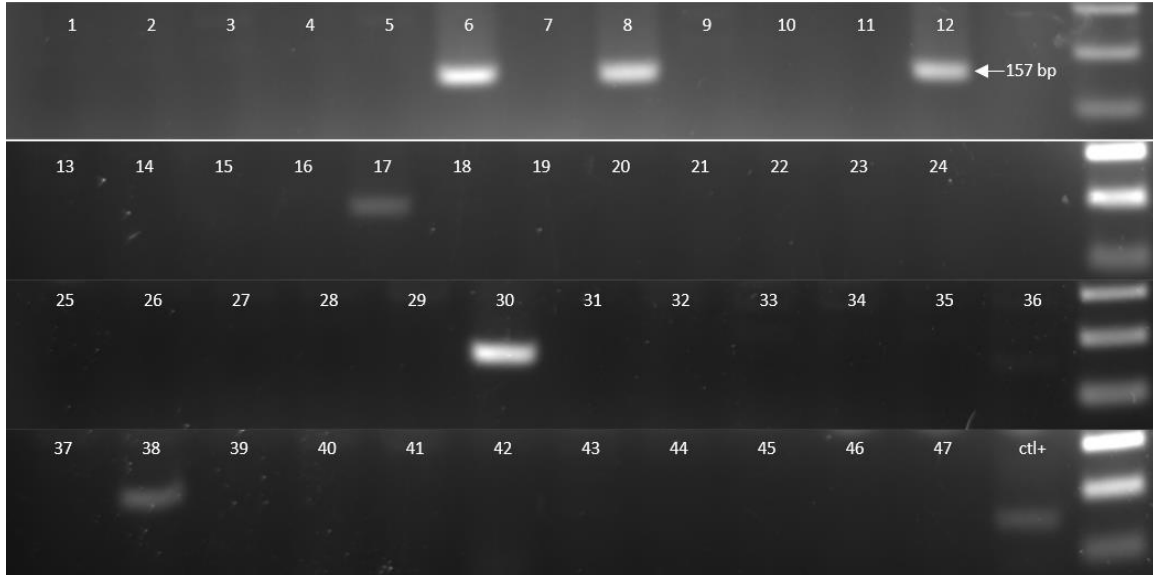

**Figure S1.** HDR editing-specific PCR screening of Jurkat cells transfected with CRISPR-Cas9 RNPs and donor ssDNA. 47 clonal cell populations were lysed and subjected to a PCR assay in which one of the primers is complementary to the correctly HDR-edited *TRIM5* region targeted for mutagenesis. A PCR product of the expected size was found in clones 6, 8, 12, 17, 30, 38. Ctl+ consisted of Jurkat cells following CRISPR components transfection but prior to the isolation of clones.

Désaulniers et al.

Editing of the TRIM5 gene decreases the permissiveness of human T lymphocytic cells to HIV-1

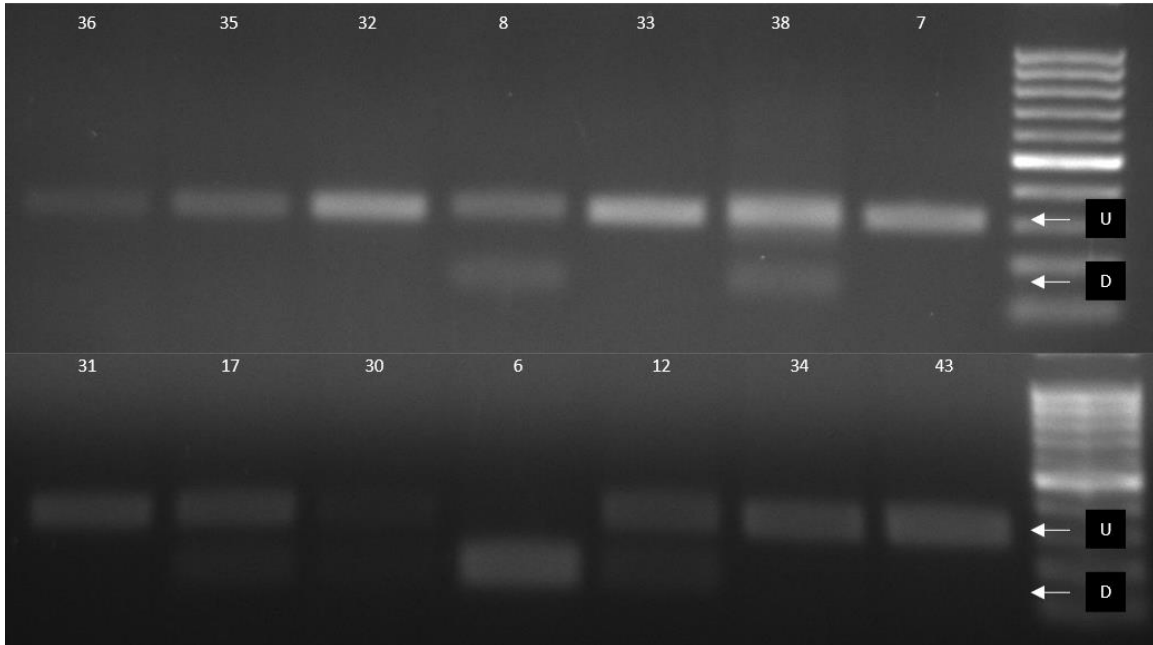

**Figure S2.** HaeIII screening of selected Jurkat clones. The 6 clones found to be positive in the HDR editing-specific PCR test, along with 8 randomly chosen negative clones, were subjected to a PCR assay using primers that bind outside of the genomic region complementary to the HDR donor DNA, followed by digestion with HaeIII. U and D indicates bands of the expected size for the undigested PCR product and the HaeIII digestion products, respectively.

Editing of the TRIM5 gene decreases the permissiveness of human T lymphocytic cells to HIV-1

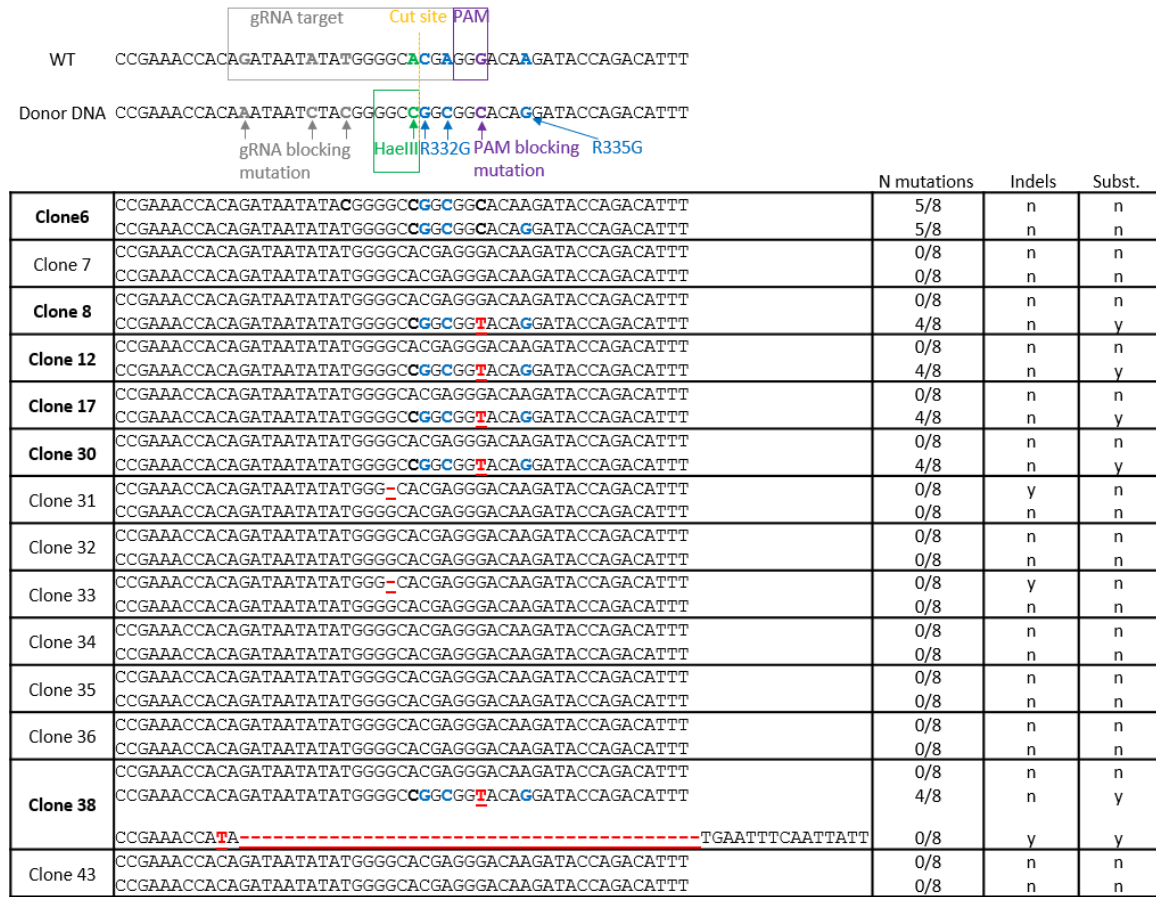

**Figure S3.** MiSeq sequencing results for all clones analyzed. This is an extended version of Figure 1, showing sequencing results for the 8 randomly chosen clones negative for HDR editing in the specific PCR test, in addition to the 6 clones found to be positive.

Editing of the TRIM5 gene decreases the permissiveness of human T lymphocytic cells to HIV-1

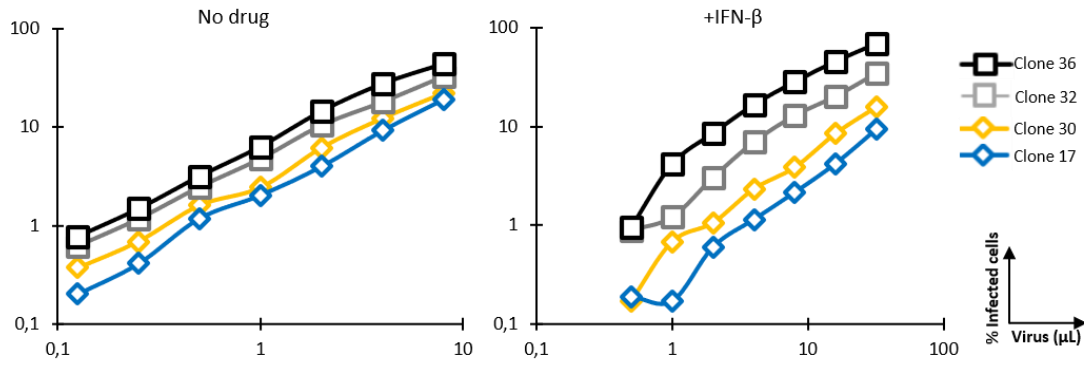

**Figure S4.** Permissiveness of HDR-edited clone 17 to HIV-1<sub>NL-GFP</sub> infection. Jurkat clonal cell populations were analyzed for permissiveness to HIV-1 infection. Clones 17 and 30 are monoallelically edited to express R332G-R335G TRIM5 $\alpha$  whereas clones 32 and 36 are unedited. Cells were infected with increasing doses of HIV-1<sub>NL-GFP</sub> in the presence or not of IFN- $\beta$ . The percentage of cells expressing GFP was determined by FACS two days later.
